# Supplementary material for: A New Methodology to Associate SNPs with Human Diseases According to Their Pathway Related Context
Source: PLoS One. 2011 Oct 25;6(10):e26277. doi: 10.1371/journal.pone.0026277 (PMC3201947; doi:10.1371/journal.pone.0026277)
Supplement: Table S4 — KEGG functional enrichment results for 100 randomly generated sub-networks is shown in Table S4. (XLSX) [file pone.0026277.s004.xlsx]

## Sheet: Copy of random_KEGG_comparative
KEGG ID	KEGG Term	Times Found (out of 100)	Term Pvalues Corr Bonf	Found Gene #	All Associated Gene #	Found Genes Combined	All Associated Genes
KEGG:05221	Acute myeloid leukemia	1	0.00156749	6	58	GRB2 IKBKG SPI1 RARA PIK3R5 MYC	[AKT1, AKT2, AKT3, ARAF, BAD, BRAF, CCNA1, CCND1, CEBPA, CHUK, EIF4EBP1, FLT3, GRB2, HRAS, IKBKB, IKBKG, JUP, KIT, KRAS, LEF1, LOC652346, MAP2K1, MAP2K2, MAPK1, MAPK3, MTOR, MYC, NFKB1, NRAS, PIK3CA, PIK3CB, PIK3CD, PIK3CG, PIK3R1, PIK3R2, PIK3R3, PIK3R5, PIM1, PIM2, PML, PPARD, RAF1, RARA, RELA, RPS6KB1, RPS6KB2, RUNX1, RUNX1T1, SOS1, SOS2, SPI1, STAT3, STAT5A, STAT5B, TCF7, TCF7L1, TCF7L2, ZBTB…
KEGG:00250	Alanine, aspartate and glutamate metabolism	1	0.0470853	4	32	GOT2 ASPA GLUD2 DDO	[ABAT, ACY3, ADSL, ADSS, ADSSL1, AGXT, AGXT2, ALDH4A1, ALDH5A1, ASL, ASNS, ASPA, ASS1, CAD, CPS1, DDO, GAD1, GAD2, GFPT1, GFPT2, GLS, GLS2, GLUD1, GLUD2, GLUL, GOT1, GOT2, GPT, GPT2, IL4I1, NIT2, PPAT]
KEGG:04960	Aldosterone-regulated sodium reabsorption	1	0.00203526	5	42	SGK1 PDPK1 ATP1B1 PIK3CA PIK3R3	[ATP1A1, ATP1A2, ATP1A3, ATP1A4, ATP1B1, ATP1B2, ATP1B3, ATP1B4, FXYD2, FXYD4, HSD11B1, HSD11B2, IGF1, INS, INSR, IRS1, IRS2, IRS4, KCNJ1, KRAS, MAPK1, MAPK3, NEDD4L, NR3C2, PDPK1, PIK3CA, PIK3CB, PIK3CD, PIK3CG, PIK3R1, PIK3R2, PIK3R3, PIK3R5, PRKCA, PRKCB, PRKCG, SCNN1A, SCNN1B, SCNN1G, SFN, SGK1, SLC9A3R2]
KEGG:05330	Allograft rejection	1	0.0070944	5	39	PRF1 HLA-B FAS HLA-DQA1 IL2	[CD28, CD40, CD40LG, CD80, CD86, FAS, FASLG, GZMB, HLA-A, HLA-B, HLA-C, HLA-DMA, HLA-DMB, HLA-DOA, HLA-DOB, HLA-DPA1, HLA-DPB1, HLA-DQA1, HLA-DQA2, HLA-DQB1, HLA-DRA, HLA-DRB1, HLA-DRB3, HLA-DRB4, HLA-DRB5, HLA-E, HLA-F, HLA-G, IFNG, IL10, IL12A, IL12B, IL2, IL4, IL5, LOC100133583, LOC652614, PRF1, TNF]
KEGG:00592	alpha-Linolenic acid metabolism	5	0.10896	7	20	ACOX1 PLA2G4A PLA2G10 PLA2G2A PLA2G4B PLA2G5 ACOX3	[ACOX1, ACOX3, FADS2, JMJD7-PLA2G4B, PLA2G10, PLA2G12A, PLA2G12B, PLA2G1B, PLA2G2A, PLA2G2C, PLA2G2D, PLA2G2E, PLA2G2F, PLA2G3, PLA2G4A, PLA2G4B, PLA2G4E, PLA2G5, PLA2G6, PLB1]
KEGG:05014	Amyotrophic lateral sclerosis (ALS)	1	0.00101568	7	54	MAP3K5 GRIA1 TOMM40 APAF1 DAXX NEFM MAP2K6	[ALS2, APAF1, BAD, BAX, BCL2, BCL2L1, BID, CASP1, CASP12, CASP3, CASP9, CAT, CCS, CHP, CHP2, CYCS, DAXX, DERL1, GPX1, GRIA1, GRIA2, GRIN1, GRIN2A, GRIN2B, GRIN2C, GRIN2D, MAP2K3, MAP2K6, MAP3K5, MAPK11, MAPK12, MAPK13, MAPK14, NEFH, NEFL, NEFM, NOS1, PPP3CA, PPP3CB, PPP3CC, PPP3R1, PPP3R2, PRPH, PRPH2, RAB5A, RAC1, SLC1A2, SOD1, TNF, TNFRSF1A, TNFRSF1B, TOMM40, TOMM40L, TP53]
KEGG:05310	Asthma	1	0.00471803	4	31	HLA-DQB1 FCER1A IL5 HLA-DOB	[CCL11, CD40, CD40LG, EPX, FCER1A, FCER1G, HLA-DMA, HLA-DMB, HLA-DOA, HLA-DOB, HLA-DPA1, HLA-DPB1, HLA-DQA1, HLA-DQA2, HLA-DQB1, HLA-DRA, HLA-DRB1, HLA-DRB3, HLA-DRB4, HLA-DRB5, IL10, IL13, IL3, IL4, IL5, IL9, LOC100133583, MS4A2, PRG2, RNASE3, TNF]
KEGG:03410	Base excision repair	3	0.0121944	10	34	POLL MUTYH POLE3 UNG POLD2 TDG NEIL1 PARP3 NTHL1 APEX1	[645490, APEX1, APEX2, FEN1, HMGB1, LIG1, LIG3, MBD4, MPG, MUTYH, NEIL1, NEIL2, NEIL3, NTHL1, OGG1, PARP1, PARP2, PARP3, PARP4, PCNA, POLB, POLD1, POLD2, POLD3, POLD4, POLE, POLE2, POLE3, POLE4, POLL, SMUG1, TDG, UNG, XRCC1]
KEGG:00524	Butirosin and neomycin biosynthesis	13	0.0852862	4	5	GCK HK3 HK2 HK1	[GCK, HK1, HK2, HK3, HKDC1]
KEGG:00232	Caffeine metabolism	15	0.226207	5	7	XDH NAT2 CYP2A6 CYP2A7 CYP1A2	[CYP1A2, CYP2A13, CYP2A6, CYP2A7, NAT1, NAT2, XDH]
KEGG:04710	Circadian rhythm	3	0.0226389	8	23	NPAS2 CSNK1D CSNK1E BTRC PER1 RORB CRY1 CLOCK	[ARNTL, BHLHE40, BHLHE41, BTRC, CLOCK, CRY1, CRY2, CSNK1D, CSNK1E, CUL1, FBXL3, FBXW11, LOC100506332, NPAS2, NR1D1, PER1, PER2, PER3, RBX1, RORA, RORB, RORC, SKP1]
KEGG:00020	Citrate cycle (TCA cycle)	2	0.0374089	4	30	SDHA SUCLG1 ACLY PCK1	[ACLY, ACO1, ACO2, CS, DLAT, DLD, DLST, FH, IDH1, IDH2, IDH3A, IDH3B, IDH3G, MDH1, MDH2, OGDH, OGDHL, PC, PCK1, PCK2, PDHA1, PDHA2, PDHB, SDHA, SDHB, SDHC, SDHD, SUCLA2, SUCLG1, SUCLG2]
KEGG:04966	Collecting duct acid secretion	1	0.010285	4	27	ATP6V1A ATP6V1D ATP6V0A2 ATP6V1F	[ATP4A, ATP4B, ATP6V0A1, ATP6V0A2, ATP6V0A4, ATP6V0C, ATP6V0D1, ATP6V0D2, ATP6V0E1, ATP6V0E2, ATP6V1A, ATP6V1B1, ATP6V1B2, ATP6V1C1, ATP6V1C2, ATP6V1D, ATP6V1E1, ATP6V1E2, ATP6V1F, ATP6V1G1, ATP6V1G2, ATP6V1G3, CA2, CLCNKB, SLC12A7, SLC4A1, TCIRG1]
KEGG:00460	Cyanoamino acid metabolism	9	0.033333	3	7	SHMT1 SHMT2 GGT7	[GBA3, GGT1, GGT5, GGT6, GGT7, SHMT1, SHMT2]
KEGG:00472	D-Arginine and D-ornithine metabolism	4	0.0370121	1	1	DAO	[DAO]
KEGG:00471	D-Glutamine and D-glutamate metabolism	13	0.149111	4	4	GLS2 GLUD2 GLUD1 GLS	[GLS, GLS2, GLUD1, GLUD2]
KEGG:03030	DNA replication	1	0.0364331	4	36	DNA2 RFC2 POLE3 MCM5	[DNA2, FEN1, LIG1, MCM2, MCM3, MCM4, MCM5, MCM6, MCM7, PCNA, POLA1, POLA2, POLD1, POLD2, POLD3, POLD4, POLE, POLE2, POLE3, POLE4, PRIM1, PRIM2, RFC1, RFC2, RFC3, RFC4, RFC5, RNASEH1, RNASEH2A, RNASEH2B, RNASEH2C, RPA1, RPA2, RPA3, RPA4, SSBP1]
KEGG:00061	Fatty acid biosynthesis	15	0.193659	4	6	MCAT ACACA FASN ACACB	[ACACA, ACACB, FASN, MCAT, OLAH, OXSM]
KEGG:00062	Fatty acid elongation in mitochondria	17	0.0391627	6	8	ACAA2 ECHS1 HADH MECR HADHA HADHB	[ACAA2, ECHS1, HADH, HADHA, HADHB, MECR, PPT1, PPT2]
KEGG:00071	Fatty acid metabolism	1	0.00413318	5	43	ACOX1 ACADSB ACADM ACADS ADH7	[ACAA1, ACAA2, ACADL, ACADM, ACADS, ACADSB, ACADVL, ACAT1, ACAT2, ACOX1, ACOX3, ACSBG2, ACSL1, ACSL3, ACSL4, ACSL5, ACSL6, ADH1A, ADH1B, ADH1C, ADH4, ADH5, ADH6, ADH7, ALDH1B1, ALDH2, ALDH3A2, ALDH7A1, ALDH9A1, CPT1A, CPT1B, CPT1C, CPT2, CYP4A11, CYP4A22, DCI, ECHS1, EHHADH, GCDH, HADH, HADHA, HADHB, PECI]
KEGG:00790	Folate biosynthesis	1	0.202492	2	11	GGH ALPP	[ALPI, ALPL, ALPP, ALPPL2, DHFR, FPGS, GCH1, GGH, PTS, QDPR, SPR]
KEGG:00052	Galactose metabolism	3	0.00435386	9	27	LALBA B4GALT1 PFKL MGAM GALT HK1 GALE PFKM GLB1	[AKR1B1, B4GALT1, B4GALT2, G6PC, G6PC2, GAA, GALE, GALK1, GALK2, GALT, GANC, GCK, GLA, GLB1, HK1, HK2, HK3, HKDC1, LALBA, LCT, MGAM, PFKL, PFKM, PFKP, PGM1, PGM2, UGP2]
KEGG:00531	Glycosaminoglycan degradation	1	0.048066	2	19	NAGLU HEXB	[ARSB, GALNS, GLB1, GNS, GUSB, HEXA, HEXB, HGSNAT, HPSE, HPSE2, HYAL1, HYAL2, HYAL3, HYAL4, IDS, IDUA, NAGLU, SGSH, SPAM1]
KEGG:00563	Glycosylphosphatidylinositol(GPI)-anchor biosynthesis	2	0.0293408	6	25	PIGK PIGF PIGY GPLD1 PIGU PIGA	[DPM2, GPAA1, GPLD1, PGAP1, PIGA, PIGB, PIGC, PIGF, PIGG, PIGH, PIGK, PIGL, PIGM, PIGN, PIGO, PIGP, PIGQ, PIGS, PIGT, PIGU, PIGV, PIGW, PIGX, PIGY, PIGZ]
KEGG:00630	Glyoxylate and dicarboxylate metabolism	3	0.017733	6	18	MUT ACAT2 ACAT1 MDH2 HYI MDH1	[ACAT1, ACAT2, ACO1, ACO2, AFMID, CS, GLYCTK, GRHPR, HAO1, HAO2, HYI, MCEE, MDH1, MDH2, MUT, PCCA, PCCB, PGP]
KEGG:05332	Graft-versus-host disease	1	0.011068	5	43	PRF1 HLA-B FAS HLA-DQA1 IL2	[CD28, CD80, CD86, FAS, FASLG, GZMB, HLA-A, HLA-B, HLA-C, HLA-DMA, HLA-DMB, HLA-DOA, HLA-DOB, HLA-DPA1, HLA-DPB1, HLA-DQA1, HLA-DQA2, HLA-DQB1, HLA-DRA, HLA-DRB1, HLA-DRB3, HLA-DRB4, HLA-DRB5, HLA-E, HLA-F, HLA-G, IFNG, IL1A, IL1B, IL2, IL6, KIR2DL1, KIR2DL2, KIR2DL3, KIR2DL5A, KIR3DL1, KIR3DL2, KLRC1, KLRD1, LOC100133583, LOC652614, PRF1, TNF]
KEGG:03440	Homologous recombination	3	0.0254679	9	28	RAD51C RAD51L1 MRE11A RAD51L3 RAD52 RPA4 RAD50 TOP3B RPA3	[BLM, BRCA2, EME1, MRE11A, MUS81, NBN, POLD1, POLD2, POLD3, POLD4, RAD50, RAD51, RAD51C, RAD51L1, RAD51L3, RAD52, RAD54B, RAD54L, RPA1, RPA2, RPA3, RPA4, SHFM1, SSBP1, TOP3A, TOP3B, XRCC2, XRCC3]
KEGG:04672	Intestinal immune network for IgA production	1	0.00411354	5	49	CD86 TNFRSF17 MADCAM1 IL15 IL2	[AICDA, CCL25, CCL27, CCL28, CCR10, CCR9, CD28, CD40, CD40LG, CD80, CD86, CXCL12, CXCR4, HLA-DMA, HLA-DMB, HLA-DOA, HLA-DOB, HLA-DPA1, HLA-DPB1, HLA-DQA1, HLA-DQA2, HLA-DQB1, HLA-DRA, HLA-DRB1, HLA-DRB3, HLA-DRB4, HLA-DRB5, ICOS, ICOSLG, IL10, IL15, IL15RA, IL2, IL4, IL5, IL6, ITGA4, ITGB7, LOC100133583, LTBR, MADCAM1, MAP3K14, PIGR, TGFB1, TNFRSF13B, TNFRSF13C, TNFRSF17, TNFSF13, TNFSF13B]
KEGG:00591	Linoleic acid metabolism	1	0.0374089	3	30	CYP3A4 PLA2G4A PLA2G10	[AKR1B10, ALOX15, CYP1A2, CYP2C18, CYP2C19, CYP2C8, CYP2C9, CYP2E1, CYP2J2, CYP3A4, CYP3A43, CYP3A5, CYP3A7, JMJD7-PLA2G4B, PLA2G10, PLA2G12A, PLA2G12B, PLA2G1B, PLA2G2A, PLA2G2C, PLA2G2D, PLA2G2E, PLA2G2F, PLA2G3, PLA2G4A, PLA2G4B, PLA2G4E, PLA2G5, PLA2G6, PLB1]
KEGG:00785	Lipoic acid metabolism	5	0.0617816	1	3	LIPT1	[LIAS, LIPT1, LIPT2]
KEGG:00300	Lysine biosynthesis	8	0.101221	3	3	AADAT ALDH7A1 AASS	[AADAT, AASS, ALDH7A1]
KEGG:04950	Maturity onset diabetes of the young	2	0.0324934	6	25	GCK INS FOXA3 NEUROD1 PDX1 NKX2-2	[BHLHA15, FOXA2, FOXA3, GCK, HES1, HHEX, HNF1A, HNF1B, HNF4A, HNF4G, IAPP, INS, MAFA, MNX1, NEUROD1, NEUROG3, NKX2-2, NKX6-1, NR5A2, ONECUT1, PAX4, PAX6, PDX1, PKLR, SLC2A2]
KEGG:05218	Melanoma	1	9.87328e-05	8	71	HRAS BRAF PIK3CD PDGFRA FGF10 EGF PTEN FGF2	[AKT1, AKT2, AKT3, ARAF, BAD, BRAF, CCND1, CDH1, CDK4, CDK6, CDKN1A, CDKN2A, E2F1, E2F2, E2F3, EGF, EGFR, FGF1, FGF10, FGF11, FGF12, FGF13, FGF14, FGF16, FGF17, FGF18, FGF19, FGF2, FGF20, FGF21, FGF22, FGF23, FGF3, FGF4, FGF5, FGF6, FGF7, FGF8, FGF9, FGFR1, HGF, HRAS, IGF1, IGF1R, KRAS, MAP2K1, MAP2K2, MAPK1, MAPK3, MDM2, MET, MITF, NRAS, PDGFA, PDGFB, PDGFC, PDGFD, PDGFRA, PDGFRB, PIK3CA, PIK3CB…
KEGG:03430	Mismatch repair	1	0.0154584	3	23	RPA1 LIG1 MLH1	[EXO1, LIG1, MLH1, MLH3, MSH2, MSH3, MSH6, PCNA, PMS2, POLD1, POLD2, POLD3, POLD4, RFC1, RFC2, RFC3, RFC4, RFC5, RPA1, RPA2, RPA3, RPA4, SSBP1]
KEGG:03450	Non-homologous end-joining	7	0.0271679	10	14	XRCC5 DCLRE1C XRCC4 MRE11A XRCC6 POLM PRKDC LIG4 NHEJ1 RAD50	[DCLRE1C, DNTT, FEN1, LIG4, LOC731751, MRE11A, NHEJ1, POLL, POLM, PRKDC, RAD50, XRCC4, XRCC5, XRCC6]
KEGG:00670	One carbon pool by folate	5	0.0814406	7	18	MTHFD1 SHMT1 MTHFR SHMT2 DHFR ATIC MTHFD1L	[ALDH1L1, ALDH1L2, AMT, ATIC, DHFR, FTCD, GART, MTFMT, MTHFD1, MTHFD1L, MTHFD2, MTHFD2L, MTHFR, MTHFS, MTR, SHMT1, SHMT2, TYMS]
KEGG:00511	Other glycan degradation	5	0.0658728	7	17	AGA MAN2C1 NEU1 ENGASE NEU3 GLB1 NEU4	[AGA, ENGASE, FUCA1, FUCA2, GBA, GLB1, HEXA, HEXB, HEXDC, MAN2B1, MAN2B2, MAN2C1, MANBA, NEU1, NEU2, NEU3, NEU4]
KEGG:00770	Pantothenate and CoA biosynthesis	2	0.0796081	4	17	BCAT2 AASDHPPT PPCS PPCDC	[AASDHPPT, BCAT1, BCAT2, COASY, DPYD, DPYS, ENPP1, ENPP3, PANK1, PANK2, PANK3, PANK4, PPCDC, PPCS, UPB1, VNN1, VNN2]
KEGG:00030	Pentose phosphate pathway	5	0.0261185	12	27	GPI RPE G6PD PFKL ALDOB PGM1 PFKP DERA TKTL2 TKT PFKM PRPS2	[ALDOA, ALDOB, ALDOC, DERA, FBP1, FBP2, G6PD, GPI, H6PD, LOC729020, PFKL, PFKM, PFKP, PGD, PGLS, PGM1, PGM2, PRPS1, PRPS1L1, PRPS2, RBKS, RPE, RPIA, TALDO1, TKT, TKTL1, TKTL2]
KEGG:00360	Phenylalanine metabolism	1	0.256956	2	17	PAH HPD	[ALDH1A3, ALDH3A1, ALDH3B1, ALDH3B2, AOC2, AOC3, DDC, GOT1, GOT2, HPD, IL4I1, MAOA, MAOB, MIF, PAH, PRDX6, TAT]
KEGG:00400	Phenylalanine, tyrosine and tryptophan biosynthesis	6	0.198607	4	5	GOT2 GOT1 PAH TAT	[GOT1, GOT2, IL4I1, PAH, TAT]
KEGG:04070	Phosphatidylinositol signaling system	1	0.00115336	8	78	PIKFYVE PIP5K1B CALM3 ITPKB DGKH INPP5D PIP4K2A CALM2	[CALM1, CALM2, CALM3, CALML3, CALML5, CALML6, CDIPT, CDS1, CDS2, DGKA, DGKB, DGKD, DGKE, DGKG, DGKH, DGKI, DGKQ, DGKZ, IMPA1, IMPA2, INPP1, INPP4A, INPP4B, INPP5A, INPP5B, INPP5D, INPP5E, INPP5J, INPP5K, INPPL1, IPPK, ITPK1, ITPKA, ITPKB, ITPR1, ITPR2, ITPR3, OCRL, PI4K2A, PI4K2B, PI4KA, PI4KB, PIK3C2A, PIK3C2B, PIK3C2G, PIK3C3, PIK3CA, PIK3CB, PIK3CD, PIK3CG, PIK3R1, PIK3R2, PIK3R3, PIK3R5, PIKF…
KEGG:04744	Phototransduction	1	0.100688	3	29	ARRB2 CALM3 CALM2	[ARRB1, ARRB2, CALM1, CALM2, CALM3, CALML3, CALML5, CALML6, CNGA1, CNGB1, GNAT1, GNAT2, GNAT3, GNB1, GNGT1, GRK1, GRK7, GUCA1A, GUCA1B, GUCA1C, GUCY2D, GUCY2F, PDE6A, PDE6B, PDE6G, RCVRN, RGS9, RHO, SLC24A1]
KEGG:00120	Primary bile acid biosynthesis	1	0.220339	2	16	BAAT SCP2	[ACOX2, AKR1C4, AKR1D1, AMACR, BAAT, CH25H, CYP27A1, CYP39A1, CYP46A1, CYP7A1, CYP7B1, CYP8B1, HSD17B4, HSD3B7, SCP2, SLC27A5]
KEGG:05340	Primary immunodeficiency	3	0.00398752	11	35	DCLRE1C CD19 CD3D CD3E TAP2 UNG TNFRSF13B AICDA IL2RG CD40 RFXAP	[ADA, AICDA, AIRE, BLNK, BTK, CD19, CD3D, CD3E, CD4, CD40, CD40LG, CD79A, CD8A, CD8B, CIITA, DCLRE1C, ICOS, IGLL1, IKBKG, IL2RG, IL7R, JAK3, LCK, PTPRC, RAG1, RAG2, RFX5, RFXANK, RFXAP, TAP1, TAP2, TNFRSF13B, TNFRSF13C, UNG, ZAP70]
KEGG:05020	Prion diseases	2	0.00884348	8	36	EGR1 C1QB C8B C9 FYN SOD1 C1QC IL1A	[BAX, C1QA, C1QB, C1QC, C5, C6, C7, C8A, C8B, C8G, C9, CASP12, CCL5, EGR1, ELK1, FYN, HSPA1A, HSPA5, IL1A, IL1B, IL6, LAMC1, MAP2K1, MAP2K2, MAPK1, MAPK3, NCAM1, NCAM2, NOTCH1, PRKACA, PRKACB, PRKACG, PRKX, PRNP, SOD1, STIP1]
KEGG:03050	Proteasome	1	0.0106295	5	45	PSMC5 PSMB6 PSMB3 IFNG PSMD8	[IFNG, LOC652826, POMP, PSMA1, PSMA2, PSMA3, PSMA4, PSMA5, PSMA6, PSMA7, PSMA8, PSMB1, PSMB10, PSMB11, PSMB2, PSMB3, PSMB4, PSMB5, PSMB6, PSMB7, PSMB8, PSMB9, PSMC1, PSMC2, PSMC3, PSMC4, PSMC5, PSMC6, PSMD1, PSMD11, PSMD12, PSMD13, PSMD14, PSMD2, PSMD3, PSMD4, PSMD6, PSMD7, PSMD8, PSME1, PSME2, PSME3, PSME4, PSMF1, SHFM1]
KEGG:03060	Protein export	1	0.0211686	3	23	SRPRB HSPA5 SEC62	[HSPA5, IMMP1L, IMMP2L, OXA1L, SEC11A, SEC11C, SEC61A1, SEC61A2, SEC61B, SEC61G, SEC62, SEC63, SPCS1, SPCS2, SPCS3, SRP14, SRP19, SRP54, SRP68, SRP72, SRP9, SRPR, SRPRB]
KEGG:04964	Proximal tubule bicarbonate reclamation	2	0.0250231	6	23	ATP1B1 GLUD2 SLC25A10 ATP1A1 AQP1 MDH1	[AQP1, ATP1A1, ATP1A2, ATP1A3, ATP1A4, ATP1B1, ATP1B2, ATP1B3, ATP1B4, CA2, CA4, FXYD2, GLS, GLS2, GLUD1, GLUD2, MDH1, PCK1, PCK2, SLC25A10, SLC38A3, SLC4A4, SLC9A3]
KEGG:00620	Pyruvate metabolism	1	0.0267268	4	40	ALDH7A1 ACAT1 MDH2 MDH1	[ACACA, ACACB, ACAT1, ACAT2, ACOT12, ACSS1, ACSS2, ACYP1, ACYP2, AKR1B1, ALDH1B1, ALDH2, ALDH3A2, ALDH7A1, ALDH9A1, DLAT, DLD, GLO1, GRHPR, HAGH, HAGHL, LDHA, LDHAL6A, LDHAL6B, LDHB, LDHC, LDHD, MDH1, MDH2, ME1, ME2, ME3, PC, PCK1, PCK2, PDHA1, PDHA2, PDHB, PKLR, PKM2]
KEGG:04140	Regulation of autophagy	1	0.0214987	4	34	GABARAPL2 INS ATG4A GABARAP	[ATG12, ATG3, ATG4A, ATG4B, ATG4C, ATG4D, ATG5, ATG7, BECN1, GABARAP, GABARAPL1, GABARAPL2, IFNA1, IFNA10, IFNA13, IFNA14, IFNA16, IFNA17, IFNA2, IFNA21, IFNA4, IFNA5, IFNA6, IFNA7, IFNA8, IFNG, INS, PIK3C3, PIK3R4, PRKAA1, PRKAA2, ULK1, ULK2, ULK3]
KEGG:05211	Renal cell carcinoma	1	0.000595795	7	70	EP300 PDGFB SOS2 ARNT2 EGLN2 RAP1B PTPN11	[AKT1, AKT2, AKT3, ARAF, ARNT, ARNT2, BRAF, CDC42, CREBBP, CRK, CRKL, CUL2, EGLN1, EGLN2, EGLN3, EP300, EPAS1, ETS1, FH, FIGF, FLCN, GAB1, GRB2, HGF, HIF1A, HRAS, JUN, KRAS, MAP2K1, MAP2K2, MAPK1, MAPK3, MET, NRAS, PAK1, PAK2, PAK3, PAK4, PAK6, PAK7, PDGFB, PGF, PIK3CA, PIK3CB, PIK3CD, PIK3CG, PIK3R1, PIK3R2, PIK3R3, PIK3R5, PTPN11, RAC1, RAF1, RAP1A, RAP1B, RAPGEF1, RBX1, SLC2A1, SOS1, SOS2, TCE…
KEGG:04614	Renin-angiotensin system	6	0.0305702	9	17	AGTR1 ACE REN AGT THOP1 ACE2 ANPEP NLN CTSG	[ACE, ACE2, AGT, AGTR1, AGTR2, ANPEP, CMA1, CPA3, CTSA, CTSG, ENPEP, LNPEP, MAS1, MME, NLN, REN, THOP1]
KEGG:00740	Riboflavin metabolism	1	0.0417562	2	12	RFK ACP5	[ACP1, ACP2, ACP5, ACP6, ACPP, ACPT, BLVRB, ENPP1, ENPP3, FLAD1, RFK, TYR]
KEGG:03020	RNA polymerase	3	0.00189693	8	30	POLR2G POLR1E POLR2K POLR3C POLR2D POLR2C POLR3E POLR3D	[POLR1A, POLR1B, POLR1C, POLR1D, POLR1E, POLR2A, POLR2B, POLR2C, POLR2D, POLR2E, POLR2F, POLR2G, POLR2H, POLR2I, POLR2J, POLR2J2, POLR2J3, POLR2K, POLR2L, POLR3A, POLR3B, POLR3C, POLR3D, POLR3E, POLR3F, POLR3G, POLR3GL, POLR3H, POLR3K, ZNRD1]
KEGG:00450	Selenocompound metabolism	2	0.0719875	4	17	CTH CCBL1 MTR TXNRD2	[CCBL1, CCBL2, CTH, INMT, MARS, MARS2, MTR, PAPSS1, PAPSS2, PSTK, SCLY, SEPHS1, SEPHS2, SEPSECS, TXNRD1, TXNRD2, TXNRD3]
KEGG:00600	Sphingolipid metabolism	1	0.014444	4	40	SPHK2 ARSA PPAP2A PPAP2B	[ACER1, ACER2, ACER3, ARSA, ASAH1, ASAH2, B4GALT6, CERK, DEGS1, DEGS2, ENPP7, GAL3ST1, GALC, GBA, GLA, GLB1, KDSR, NEU1, NEU2, NEU3, NEU4, PPAP2A, PPAP2B, PPAP2C, SGMS1, SGMS2, SGPL1, SGPP1, SGPP2, SMPD1, SMPD2, SMPD3, SMPD4, SPHK1, SPHK2, SPTLC1, SPTLC2, SPTLC3, UGCG, UGT8]
KEGG:00100	Steroid biosynthesis	1	0.121549	2	19	EBP DHCR7	[C5orf4, CEL, CYP27B1, CYP2R1, CYP51A1, DHCR24, DHCR7, EBP, FDFT1, HSD17B7, LIPA, LSS, NSDHL, SC4MOL, SC5DL, SOAT1, SOAT2, SQLE, TM7SF2]
KEGG:04122	Sulfur relay system	10	0.157609	4	10	TST MOCS3 MOCS2 MPST	[CTU1, CTU2, MOCS1, MOCS2, MOCS3, MPST, NFS1, TRMU, TST, URM1]
KEGG:00072	Synthesis and degradation of ketone bodies	19	0.045008	7	9	HMGCS2 HMGCS1 OXCT2 ACAT2 ACAT1 BDH1 HMGCL	[ACAT1, ACAT2, BDH1, BDH2, HMGCL, HMGCS1, HMGCS2, OXCT1, OXCT2]
KEGG:00430	Taurine and hypotaurine metabolism	8	0.363635	4	10	GAD2 BAAT GGT7 GAD1	[ADO, BAAT, CDO1, CSAD, GAD1, GAD2, GGT1, GGT5, GGT6, GGT7]
KEGG:00900	Terpenoid backbone biosynthesis	4	0.0352073	5	15	MVD HMGCS1 FDPS MVK PMVK	[ACAT1, ACAT2, DHDDS, FDPS, GGPS1, HMGCR, HMGCS1, HMGCS2, IDI1, IDI2, MVD, MVK, PDSS1, PDSS2, PMVK]
KEGG:05216	Thyroid cancer	4	0.0333336	10	29	BRAF RXRB MAP2K2 MAPK3 PPARG RXRG LEF1 TFG CDH1 CTNNB1	[BRAF, CCDC6, CCND1, CDH1, CTNNB1, HRAS, KRAS, LEF1, MAP2K1, MAP2K2, MAPK1, MAPK3, MYC, NCOA4, NRAS, NTRK1, PAX8, PPARG, RET, RXRA, RXRB, RXRG, TCF7, TCF7L1, TCF7L2, TFG, TP53, TPM3, TPR]
KEGG:04940	Type I diabetes mellitus	1	0.0135707	5	45	PRF1 HLA-B FAS HLA-DQA1 IL2	[CD28, CD80, CD86, CPE, FAS, FASLG, GAD1, GAD2, GZMB, HLA-A, HLA-B, HLA-C, HLA-DMA, HLA-DMB, HLA-DOA, HLA-DOB, HLA-DPA1, HLA-DPB1, HLA-DQA1, HLA-DQA2, HLA-DQB1, HLA-DRA, HLA-DRB1, HLA-DRB3, HLA-DRB4, HLA-DRB5, HLA-E, HLA-F, HLA-G, HSPD1, ICA1, IFNG, IL12A, IL12B, IL1A, IL1B, IL2, INS, LOC100133583, LOC652614, LTA, PRF1, PTPRN, PTPRN2, TNF]
KEGG:00130	Ubiquinone and other terpenoid-quinone biosynthesis	8	0.249462	3	7	TAT HPD COQ6	[COQ2, COQ3, COQ5, COQ6, COQ7, HPD, TAT]
KEGG:00290	Valine, leucine and isoleucine biosynthesis	3	0.0407204	5	11	BCAT1 PDHA2 IARS2 VARS PDHB	[BCAT1, BCAT2, IARS, IARS2, LARS, LARS2, PDHA1, PDHA2, PDHB, VARS, VARS2]
KEGG:00750	Vitamin B6 metabolism	7	0.0321127	3	6	PDXK PDXP PSAT1	[AOX1, PDXK, PDXP, PHOSPHO2, PNPO, PSAT1]
